# Supplementary material
Source: HighWire-hosted journal article supplement (https://le.uwpress.org/content/suppl/2025/10/06/le.102.1.271914)
Supplement: LE-102-1-Khorshidi-app.pdf [file LE-102-1-Khorshidi-app.pdf]

## APPENDIX

**Table A1.** Structured procedure for evaluating *LE* based on the SPAR-4-SLR framework.

|            |                | Activity                                                                                                                                                                                                                                                                                                                                                                                                                                                                                                                                                                                                                                                                                                                                                                                                                                                                               |
|------------|----------------|----------------------------------------------------------------------------------------------------------------------------------------------------------------------------------------------------------------------------------------------------------------------------------------------------------------------------------------------------------------------------------------------------------------------------------------------------------------------------------------------------------------------------------------------------------------------------------------------------------------------------------------------------------------------------------------------------------------------------------------------------------------------------------------------------------------------------------------------------------------------------------------|
| Assembling | Identification | <p>Domain: <i>Land Economics (LE)</i>.</p> <p>Research objective: Provide a bibliometric retrospective of <i>LE</i>.</p> <p>Research questions:</p> <ol style="list-style-type: none"> <li>1) What is the current position of <i>LE</i> in the scientific community?</li> <li>2) Which are the most cited articles of <i>LE</i>?</li> <li>3) Which documents does <i>LE</i> cite more frequently?</li> <li>4) Who are the most productive authors, institutions and countries of <i>LE</i>?</li> <li>5) How is the co-citation and bibliographic coupling structure of <i>LE</i>?</li> <li>6) How is the keyword and topical structure of <i>LE</i>?</li> </ol>                                                                                                                                                                                                                        |
|            | Acquisition    | <p>Search platform: WoS Core Collection.</p> <p>Search period: 1925-2024. The search was performed in May 2025.</p> <p>Publication Title: <i>Land Economics</i> OR <i>Journal of Land and Public Utility Economics</i>.</p> <p>Results = 5,552.</p> <p>Additional results: JCR (WoS), Sources (Scopus) and SciVal (Scopus).</p>                                                                                                                                                                                                                                                                                                                                                                                                                                                                                                                                                        |
| Arranging  | Purification   | <p>Filter 1. Exclude 2025 (1925-2024).</p> <p>Number of documents: 5,538.</p> <p>Filter 2: Article &amp; Review &amp; Note.</p> <p>Final number: 4,399 documents.</p> <p>Computer software: VOS viewer, <i>bibliometrix</i>, <i>biblioshiny</i> and Microsoft Excel.</p>                                                                                                                                                                                                                                                                                                                                                                                                                                                                                                                                                                                                               |
| Assessing  | Evaluation     | <p>Performance analysis:</p> <ol style="list-style-type: none"> <li>1) Rankings with bibliometric indicators according to the number of articles and citations.</li> <li>2) Bibliometric indicators: Number of documents and citations, cites per paper, the H-index, cites per year, papers and cites per capita, and temporal classification.</li> </ol> <p>Graphical analysis:</p> <ol style="list-style-type: none"> <li>1) Mapping with VOS viewer and <i>bibliometrix</i> software.</li> <li>2) Analysis with co-citation, bibliographic coupling, and co-occurrence of author keywords.</li> </ol> <p>Agenda proposal method:</p> <ol style="list-style-type: none"> <li>1) Present a bibliometric review of <i>LE</i> between 1925 and 2024.</li> <li>2) Analyze the leading and current trends of <i>LE</i>.</li> <li>3) Study open questions for future research.</li> </ol> |
|            | Reporting      | <p>Reporting conventions: Explanations with numbers, tables and figures.</p> <p>Limitations:</p> <ol style="list-style-type: none"> <li>1) The bibliographic information is from May 2025 but changes through time.</li> <li>2) The weaknesses of the WoS database influence the results of this study.</li> <li>3) It is not easy to compare the publication and citation characteristics of different subfields.</li> </ol>                                                                                                                                                                                                                                                                                                                                                                                                                                                          |

**Table A2.** Annual citation distribution of *LE* publications (1925–2024).

| Year | TP | TC  | ≥200 | ≥100 | ≥50 | ≥20 | ≥10 | ≥5 | ≥1 | T50 |
|------|----|-----|------|------|-----|-----|-----|----|----|-----|
| 1925 | 38 | 71  | 0    | 0    | 0   | 1   | 1   | 3  | 23 | 0   |
| 1926 | 33 | 74  | 0    | 0    | 0   | 1   | 1   | 5  | 13 | 0   |
| 1927 | 32 | 28  | 0    | 0    | 0   | 0   | 0   | 1  | 13 | 0   |
| 1928 | 36 | 38  | 0    | 0    | 0   | 0   | 0   | 1  | 21 | 0   |
| 1929 | 34 | 27  | 0    | 0    | 0   | 0   | 0   | 1  | 15 | 0   |
| 1930 | 37 | 19  | 0    | 0    | 0   | 0   | 0   | 0  | 12 | 0   |
| 1931 | 29 | 21  | 0    | 0    | 0   | 0   | 0   | 0  | 12 | 0   |
| 1932 | 35 | 27  | 0    | 0    | 0   | 0   | 0   | 0  | 17 | 0   |
| 1933 | 36 | 41  | 0    | 0    | 0   | 0   | 0   | 2  | 17 | 0   |
| 1934 | 32 | 25  | 0    | 0    | 0   | 0   | 0   | 1  | 14 | 0   |
| 1935 | 57 | 23  | 0    | 0    | 0   | 0   | 0   | 0  | 19 | 0   |
| 1936 | 71 | 72  | 0    | 0    | 0   | 0   | 1   | 3  | 33 | 0   |
| 1937 | 64 | 29  | 0    | 0    | 0   | 0   | 0   | 2  | 16 | 0   |
| 1938 | 71 | 41  | 0    | 0    | 0   | 0   | 0   | 1  | 23 | 0   |
| 1939 | 71 | 41  | 0    | 0    | 0   | 0   | 0   | 0  | 28 | 0   |
| 1940 | 73 | 79  | 0    | 0    | 0   | 1   | 1   | 2  | 24 | 0   |
| 1941 | 66 | 40  | 0    | 0    | 0   | 0   | 1   | 1  | 20 | 0   |
| 1942 | 63 | 59  | 0    | 0    | 0   | 0   | 2   | 4  | 18 | 0   |
| 1943 | 49 | 40  | 0    | 0    | 0   | 0   | 0   | 2  | 18 | 0   |
| 1944 | 36 | 26  | 0    | 0    | 0   | 0   | 0   | 2  | 12 | 0   |
| 1945 | 37 | 35  | 0    | 0    | 0   | 0   | 0   | 3  | 12 | 0   |
| 1946 | 43 | 37  | 0    | 0    | 0   | 0   | 0   | 2  | 15 | 0   |
| 1947 | 40 | 36  | 0    | 0    | 0   | 0   | 0   | 2  | 14 | 0   |
| 1948 | 39 | 47  | 0    | 0    | 0   | 0   | 2   | 3  | 13 | 0   |
| 1949 | 43 | 100 | 0    | 0    | 0   | 0   | 2   | 7  | 21 | 0   |
| 1950 | 42 | 49  | 0    | 0    | 0   | 0   | 0   | 3  | 16 | 0   |
| 1951 | 33 | 36  | 0    | 0    | 0   | 0   | 1   | 3  | 10 | 0   |
| 1952 | 42 | 67  | 0    | 0    | 0   | 0   | 0   | 4  | 24 | 0   |
| 1953 | 34 | 108 | 0    | 0    | 1   | 1   | 2   | 5  | 18 | 0   |
| 1954 | 39 | 146 | 0    | 0    | 0   | 2   | 2   | 10 | 26 | 0   |
| 1955 | 33 | 85  | 0    | 0    | 0   | 0   | 3   | 6  | 21 | 0   |
| 1956 | 40 | 147 | 0    | 0    | 0   | 1   | 5   | 9  | 24 | 0   |
| 1957 | 37 | 132 | 0    | 0    | 0   | 1   | 3   | 8  | 18 | 0   |
| 1958 | 29 | 102 | 0    | 0    | 1   | 1   | 1   | 3  | 17 | 0   |
| 1959 | 27 | 53  | 0    | 0    | 0   | 0   | 1   | 4  | 16 | 0   |
| 1960 | 43 | 188 | 0    | 1    | 1   | 1   | 2   | 7  | 23 | 0   |
| 1961 | 40 | 125 | 0    | 0    | 0   | 1   | 2   | 8  | 23 | 0   |
| 1962 | 36 | 306 | 0    | 1    | 2   | 4   | 6   | 7  | 23 | 0   |
| 1963 | 40 | 714 | 1    | 1    | 3   | 5   | 9   | 12 | 25 | 1   |
| 1964 | 56 | 202 | 0    | 0    | 1   | 2   | 4   | 15 | 37 | 0   |
| 1965 | 57 | 379 | 0    | 1    | 2   | 2   | 7   | 13 | 37 | 0   |
| 1966 | 65 | 420 | 0    | 1    | 2   | 5   | 8   | 11 | 37 | 1   |
| 1967 | 62 | 262 | 0    | 0    | 0   | 3   | 7   | 16 | 43 | 0   |

|      |    |       |   |    |    |    |    |    |    |   |
|------|----|-------|---|----|----|----|----|----|----|---|
| 1968 | 63 | 296   | 0 | 0  | 2  | 3  | 8  | 13 | 34 | 0 |
| 1969 | 59 | 209   | 0 | 0  | 0  | 0  | 7  | 17 | 43 | 0 |
| 1970 | 56 | 247   | 0 | 0  | 0  | 2  | 8  | 17 | 44 | 0 |
| 1971 | 53 | 204   | 0 | 0  | 1  | 3  | 4  | 8  | 36 | 0 |
| 1972 | 67 | 279   | 0 | 0  | 1  | 2  | 10 | 18 | 41 | 0 |
| 1973 | 60 | 396   | 0 | 0  | 2  | 4  | 10 | 24 | 47 | 0 |
| 1974 | 62 | 370   | 0 | 0  | 0  | 6  | 10 | 23 | 49 | 0 |
| 1975 | 35 | 388   | 0 | 0  | 2  | 6  | 11 | 16 | 30 | 0 |
| 1976 | 47 | 684   | 1 | 1  | 2  | 7  | 14 | 26 | 41 | 1 |
| 1977 | 43 | 407   | 0 | 1  | 2  | 6  | 9  | 17 | 36 | 0 |
| 1978 | 46 | 790   | 0 | 1  | 5  | 11 | 17 | 25 | 42 | 0 |
| 1979 | 43 | 571   | 0 | 1  | 3  | 9  | 14 | 21 | 36 | 0 |
| 1980 | 38 | 1,229 | 1 | 3  | 7  | 17 | 22 | 27 | 36 | 1 |
| 1981 | 61 | 1,162 | 0 | 3  | 8  | 14 | 22 | 35 | 58 | 0 |
| 1982 | 48 | 1,200 | 1 | 3  | 6  | 15 | 23 | 32 | 44 | 1 |
| 1983 | 44 | 669   | 0 | 2  | 3  | 9  | 16 | 25 | 40 | 0 |
| 1984 | 49 | 1,184 | 2 | 3  | 4  | 11 | 21 | 31 | 43 | 2 |
| 1985 | 52 | 1,247 | 0 | 5  | 5  | 17 | 21 | 32 | 45 | 1 |
| 1986 | 47 | 989   | 1 | 2  | 3  | 15 | 20 | 31 | 43 | 1 |
| 1987 | 42 | 712   | 0 | 0  | 6  | 8  | 17 | 22 | 36 | 0 |
| 1988 | 37 | 782   | 0 | 1  | 6  | 11 | 18 | 23 | 34 | 0 |
| 1989 | 41 | 1,132 | 0 | 4  | 6  | 16 | 22 | 28 | 37 | 1 |
| 1990 | 41 | 1,668 | 1 | 5  | 10 | 22 | 29 | 37 | 40 | 1 |
| 1991 | 42 | 1,436 | 2 | 3  | 8  | 17 | 25 | 32 | 39 | 2 |
| 1992 | 39 | 2,707 | 1 | 4  | 10 | 18 | 25 | 32 | 38 | 1 |
| 1993 | 39 | 1,323 | 1 | 3  | 8  | 18 | 26 | 29 | 36 | 1 |
| 1994 | 43 | 1,868 | 2 | 6  | 11 | 18 | 35 | 38 | 42 | 3 |
| 1995 | 45 | 1,427 | 1 | 2  | 10 | 22 | 30 | 34 | 43 | 1 |
| 1996 | 37 | 2,461 | 3 | 8  | 15 | 25 | 30 | 32 | 36 | 4 |
| 1997 | 40 | 2,265 | 0 | 6  | 18 | 31 | 37 | 40 | 40 | 1 |
| 1998 | 37 | 2,228 | 2 | 3  | 12 | 27 | 31 | 35 | 37 | 2 |
| 1999 | 42 | 1,882 | 0 | 3  | 19 | 29 | 33 | 38 | 41 | 0 |
| 2000 | 44 | 2,518 | 1 | 7  | 18 | 33 | 37 | 41 | 44 | 3 |
| 2001 | 42 | 2,248 | 1 | 10 | 15 | 30 | 36 | 39 | 41 | 2 |
| 2002 | 42 | 2,610 | 3 | 9  | 18 | 29 | 35 | 40 | 41 | 3 |
| 2003 | 39 | 2,237 | 3 | 5  | 11 | 26 | 34 | 38 | 39 | 3 |
| 2004 | 39 | 1,634 | 1 | 3  | 13 | 20 | 31 | 34 | 37 | 2 |
| 2005 | 36 | 2,149 | 2 | 6  | 13 | 29 | 33 | 33 | 36 | 2 |
| 2006 | 36 | 1,314 | 0 | 2  | 11 | 25 | 32 | 34 | 36 | 0 |
| 2007 | 35 | 1,277 | 0 | 4  | 9  | 17 | 26 | 31 | 35 | 1 |
| 2008 | 42 | 2,030 | 1 | 6  | 14 | 26 | 33 | 37 | 42 | 2 |
| 2009 | 46 | 1,571 | 0 | 1  | 12 | 29 | 40 | 41 | 45 | 0 |
| 2010 | 44 | 1,638 | 0 | 3  | 11 | 27 | 35 | 41 | 43 | 0 |
| 2011 | 44 | 1,455 | 1 | 2  | 10 | 23 | 36 | 41 | 44 | 1 |
| 2012 | 41 | 1,441 | 1 | 2  | 7  | 21 | 31 | 39 | 41 | 2 |

|         |       |        |      |      |       |       |       |       |       |    |
|---------|-------|--------|------|------|-------|-------|-------|-------|-------|----|
| 2013    | 39    | 1,538  | 1    | 4    | 8     | 21    | 32    | 37    | 39    | 2  |
| 2014    | 37    | 1,414  | 1    | 2    | 6     | 17    | 27    | 33    | 37    | 1  |
| 2015    | 39    | 1,032  | 0    | 1    | 6     | 21    | 33    | 35    | 37    | 0  |
| 2016    | 39    | 785    | 0    | 1    | 2     | 14    | 27    | 35    | 39    | 0  |
| 2017    | 36    | 516    | 0    | 0    | 1     | 10    | 20    | 31    | 35    | 0  |
| 2018    | 35    | 518    | 0    | 0    | 0     | 9     | 20    | 28    | 35    | 0  |
| 2019    | 34    | 395    | 0    | 0    | 0     | 7     | 14    | 24    | 33    | 0  |
| 2020    | 33    | 274    | 0    | 0    | 0     | 3     | 11    | 19    | 31    | 0  |
| 2021    | 52    | 268    | 0    | 0    | 0     | 1     | 8     | 21    | 48    | 0  |
| 2022    | 39    | 188    | 0    | 0    | 0     | 0     | 4     | 17    | 37    | 0  |
| 2023    | 33    | 72     | 0    | 0    | 0     | 0     | 0     | 5     | 25    | 0  |
| 2024    | 35    | 61     | 0    | 0    | 0     | 0     | 1     | 3     | 24    | 0  |
| 1975-24 | 2,059 | 63,594 | 35   | 141  | 374   | 837   | 1,204 | 1,515 | 1,937 | 48 |
| % 75-24 | 100   | -      | 1.70 | 6.85 | 18.16 | 40.65 | 58.47 | 73.58 | 94.07 | -  |
| Total   | 4,399 | 70,192 | 36   | 146  | 393   | 889   | 1,335 | 1,827 | 3,112 | 50 |
| % Total | 100   | -      | 0.82 | 3.32 | 8.93  | 20.21 | 30.35 | 41.53 | 70.74 | -  |

Abbreviations: TP and TC = Total papers and citations;  $\geq 200$ ,  $\geq 100$ ,  $\geq 50$ ,  $\geq 20$ ,  $\geq 10$ ,  $\geq 5$ ,  $\geq 1$  = Number of papers with equal or more than 200, 100, 50, 20, 10, 5 and 1 citations; T50 = Number of documents in the Top 50 of Table A3.

**Table A3.** The 50 most cited papers in *LE* (1925–2024), ranked by total and annual citations.

| R  | Title                                                                                                                                                   | Author/s                                                          | Year | TC    | C/Y   |
|----|---------------------------------------------------------------------------------------------------------------------------------------------------------|-------------------------------------------------------------------|------|-------|-------|
| 1  | Property-rights regimes and natural resources - a conceptual analysis                                                                                   | Schlager, E; Ostrom, E                                            | 1992 | 1,389 | 42.09 |
| 2  | Recreation demand models with taste differences over people                                                                                             | Train, KE                                                         | 1998 | 673   | 24.93 |
| 3  | A probabilistic analysis of shopping-center trade areas                                                                                                 | Huff, DL                                                          | 1963 | 438   | 7.06  |
| 4  | Price and income elasticities of residential water demand: A meta-analysis                                                                              | Dalhuisen, JM; Florax, RJGM; de Groot, HLF; Nijkamp, P            | 2003 | 409   | 18.59 |
| 5  | The adoption and impact of soil and water conservation technology: An endogenous switching regression application                                       | Abdulai, A; Huffman, W                                            | 2014 | 400   | 36.36 |
| 6  | The effects of open space on residential property values                                                                                                | Irwin, EG                                                         | 2002 | 398   | 17.30 |
| 7  | Contingent valuation and revealed preference methodologies: Comparing the estimates for quasi-public goods                                              | Carson, RT; Flores, NE; Martin, KM; Wright, JL                    | 1996 | 364   | 12.55 |
| 8  | Modeling the drivers of urban land use change in the Pearl River Delta, China: Integrating remote sensing with socioeconomic data                       | Seto, KC; Kaufmann, RK                                            | 2003 | 349   | 15.86 |
| 9  | Why do firms volunteer to exceed environmental regulations? Understanding participation in EPA’s 33/50 program                                          | Arora, S; Cason, TN                                               | 1996 | 299   | 10.31 |
| 10 | The concept of value in resource-allocation                                                                                                             | Brown, TC                                                         | 1984 | 297   | 7.24  |
| 11 | Grain for green: Cost-effectiveness and sustainability of China's conservation set-aside program                                                        | Uchida, E; Xu, JT; Rozelle, S                                     | 2005 | 292   | 14.60 |
| 12 | Destination choice models for rock climbing in the Northeastern Alps: A latent-class approach based on intensity of a latent-class approach preferences | Scarpa, R; Thiene, M                                              | 2005 | 286   | 14.30 |
| 13 | Micro-neighborhood externalities and hedonic housing prices                                                                                             | Li, MM; Brown, HJ                                                 | 1980 | 286   | 6.36  |
| 14 | A critical review of the individual quota as a device in fisheries management                                                                           | Copes, P                                                          | 2019 | 284   | 7.28  |
| 15 | Effects of flood hazards on property values: Evidence before and after Hurricane Floyd                                                                  | Bin, O; Polasky, S                                                | 2004 | 271   | 12.90 |
| 16 | Factors affecting the use of soil conservation practices - hypotheses, evidence, and policy implications                                                | Ervin, CA; Ervin, DE                                              | 1982 | 262   | 6.09  |
| 17 | Valuing urban wetlands: A property price approach                                                                                                       | Mahan, BL; Polasky, S; Adams, RM                                  | 2000 | 252   | 10.08 |
| 18 | Corporate environmental management: Regulatory and market-based incentives                                                                              | Khanna, M; Anton, WRQ                                             | 2002 | 242   | 10.52 |
| 19 | Value of time in recreation benefit studies                                                                                                             | Cesario, FJ                                                       | 1976 | 242   | 4.94  |
| 20 | Which response format reveals the truth about donations to a public good?                                                                               | Brown, TC; Champ, PA; Bishop, RC; McCollum, DW                    | 1996 | 229   | 7.90  |
| 21 | Hypothetical surveys and real economic commitments                                                                                                      | Neill, HR; Cummings, RG; Ganderton, PT; Harrison, GW; McGuckin, T | 1994 | 229   | 7.39  |
| 22 | Demand side management policies for residential water use: Who bears the conservation burden?                                                           | Renwick, ME; Archibald, SO                                        | 2018 | 226   | 8.37  |
| 23 | Selecting biological reserves cost-effectively: An application to terrestrial vertebrate conservation in Oregon                                         | Polasky, S; Camm, JD; Garber-Yonts, B                             | 2001 | 224   | 9.33  |
| 24 | Confidence-intervals for evaluating benefits estimates from dichotomous choice contingent valuation studies                                             | Park, T; Loomis, JB; Creel, M                                     | 1991 | 220   | 6.47  |
| 25 | Valuing option, existence, and bequest demands for wilderness                                                                                           | Walsh, RG; Loomis, JB; Gillman, RA                                | 1984 | 220   | 5.37  |

|    |                                                                                                                                   |                                                                          |      |     |       |
|----|-----------------------------------------------------------------------------------------------------------------------------------|--------------------------------------------------------------------------|------|-----|-------|
| 26 | A discrete-continuous choice approach to residential water demand under block rate pricing                                        | Hewitt, JA; Hanemann, WM                                                 | 1995 | 216 | 7.20  |
| 27 | A nonparametric approach to the estimation of welfare measures in discrete response valuation studies                             | Kristrom, B                                                              | 1990 | 216 | 6.17  |
| 28 | Forest conservation and slippage: Evidence from Mexico's national payments for ecosystem services program                         | Alix-Garcia, JM; Shapiro, EN; Sims, KRE                                  | 2012 | 214 | 16.46 |
| 29 | How can African agriculture adapt to climate change? A counterfactual analysis from Ethiopia                                      | Di Falco, S; Veronesi, M                                                 | 2013 | 213 | 17.75 |
| 30 | Measuring the existence value of wildlife - what do CVM estimates really show                                                     | Stevens, TH; Echeverria, J; Glass, RJ; Hager, T; More, TA                | 1991 | 212 | 6.24  |
| 31 | Deforestation and the rule of law in a cross-section of countries                                                                 | Deacon, RT                                                               | 1994 | 209 | 6.74  |
| 32 | The impact of the Miami Metrorail on the value of residences near station locations                                               | Gatzlaff, DH; Smith, MT                                                  | 1993 | 209 | 6.53  |
| 33 | Impacts of land certification on tenure security, investment, and land market participation: Evidence from Ethiopia               | Deininger, K; Ali, DA; Alemu, T                                          | 2011 | 208 | 14.86 |
| 34 | The cost-effectiveness of conservation payments                                                                                   | Ferraro, PJ; Simpson, RD                                                 | 2002 | 208 | 9.04  |
| 35 | Climate, water, and agriculture                                                                                                   | Mendelsohn, R; Dinar, A                                                  | 2003 | 207 | 9.41  |
| 36 | Public benefits, private benefits, and policy mechanism choice for land-use change for environmental benefits                     | Pannell, DJ                                                              | 2008 | 201 | 11.82 |
| 37 | What drives land use change in the United States? A national analysis of landowner decisions                                      | Lubowski, RN; Plantinga, AJ; Stavins, RN                                 | 2008 | 195 | 11.47 |
| 38 | Do payments for environmental services affect forest cover? A farm-level evaluation from Costa Rica                               | Arriagada, RA; Ferraro, PJ; Sills, EO; Pattanayak, SK; Cordero-Sancho, S | 2012 | 193 | 14.85 |
| 39 | Do tropical forests provide natural insurance? The microeconomics of non-timber forest product collection in the Brazilian Amazon | Pattanayak, SK; Sills, EO                                                | 2001 | 193 | 8.04  |
| 40 | Fuelwood consumption and forest degradation: A household model for domestic energy substitution in rural India                    | Heltberg, R; Arndt, TC; Sekhar, NU                                       | 2000 | 193 | 7.72  |
| 41 | Patterns of behavior in endangered species preservation                                                                           | Metrick, A; Weitzman, ML                                                 | 1996 | 192 | 6.62  |
| 42 | Conservation tillage - the role of farm and operator characteristics and the perception of soil-erosion                           | Gould, BW; Saupe, WE; Klemme, RM                                         | 1989 | 192 | 5.33  |
| 43 | Targeting tools for the purchase of environmental amenities                                                                       | Babcock, BA; Lakshminarayan, PG; Wu, JJ; Zilberman, D                    | 1997 | 189 | 6.75  |
| 44 | Normative and social influences affecting compliance with fishery regulations                                                     | Hatcher, A; Jaffry, S; Thébaud, O; Bennett, E                            | 2000 | 179 | 7.16  |
| 45 | Benefit estimates for landscape improvements: Sequential Bayesian design and respondents' rationality in a choice experiment      | Scarpa, R; Campbell, D; Hutchinson, WG                                   | 2007 | 178 | 9.89  |
| 46 | Forgetting the flood? An analysis of the flood risk discount over time                                                            | Atreya, A; Ferreira, S; Kriesel, W                                       | 2013 | 173 | 14.42 |
| 47 | Estimating leakage from forest carbon sequestration programs                                                                      | Murray, BC; McCarl, BA; Lee, HC                                          | 2004 | 173 | 8.24  |
| 48 | Validation of empirical measures of welfare change - a comparison of nonmarket techniques                                         | Seller, C; Stoll, JR; Chavas, JP                                         | 1985 | 173 | 4.33  |
| 49 | Valuing environmental functions - tropical wetlands                                                                               | Barbier, EB                                                              | 1994 | 165 | 5.32  |
| 50 | Programmed solution for approximating an optimum retail location                                                                  | Huff, DL                                                                 | 1966 | 165 | 2.80  |

Abbreviations: R = Rank; TC = Total citations; C/Y = Cites per year.

Table A4 presents the most prolific contributors among institutions and countries, based on the number of unique publications that cite *LE* (TP denotes unique citing publications). Institutionally, the U.S. Department of Agriculture dominates with 850 unique citing publications, aligning with its mandate on agricultural economics, conservation, and resource management. It is followed by CGIAR (606), a global partnership focused on food systems and sustainability, and Michigan State University (549), which has a strong tradition in applied environmental and agricultural economics. These institutions underscore *LE*'s utility in policy-driven and interdisciplinary research agendas.

At the national level, the United States overwhelmingly leads with 18,741 unique citing articles, constituting nearly half of all unique citing articles to *LE*. This reflects the journal's U.S. origins and its alignment with key research themes in American environmental and resource economics. However, international engagement is also significant: China (3,861), the United Kingdom (3,654), Canada (2,413), and Australia (2,380) form the next tier of contributors, indicating *LE*'s broad global visibility and growing relevance across diverse geographic contexts.

Table A5 identifies the 49 most productive institutions in *LE*, ranked by the number of publications (TP), total citations (TC), and citation-per-paper (C/P) rates, alongside H-index values and their temporal contributions across four eras (D1 to D4). The University of Wisconsin–Madison (USA) emerges as the leading institution with 124 papers, 3,701 citations, and an H-index of 29. Its dominance is further marked by a consistent publication pattern across all decades, with especially strong representation in the early periods (D1 and D2).

The U.S. Department of Agriculture (USDA) ranks second with 101 publications and the highest cumulative citation count (4,284), reflecting both its policy relevance and research longevity. Notably, USDA also holds the highest H-index (35) and a robust citation-per-paper ratio (42.42), indicating sustained scholarly influence.

Oregon State University and the University of Maryland—each with over 50 publications and citation rates exceeding 35 per paper—demonstrate concentrated academic output in applied environmental and land policy research. The U.S. Forest Service also stands out with a C/P of 58.98, further underscoring the impact of government-affiliated research bodies in shaping *LE*'s scholarly footprint.

**Table A4.** Most active contributors in citing *LE* articles, categorized by institutions and countries.

| R  | University                    | TP  | Country      | TP     |
|----|-------------------------------|-----|--------------|--------|
| 1  | US Dep Agric                  | 850 | USA          | 18,741 |
| 2  | CGIAR                         | 606 | PR China     | 3,861  |
| 3  | Michigan State U              | 549 | UK           | 3,654  |
| 4  | United States Forest Service  | 538 | Canada       | 2,413  |
| 5  | U Wisconsin Madison           | 507 | Australia    | 2,380  |
| 6  | Chinese Academy of Sciences   | 483 | Germany      | 2,082  |
| 7  | INRAE                         | 481 | Spain        | 1,568  |
| 8  | Oregon State U                | 465 | France       | 1,381  |
| 9  | Ohio State U                  | 460 | Netherlands  | 1,361  |
| 10 | Colorado State U Fort Collins | 445 | Italy        | 1,236  |
| 11 | U Florida                     | 445 | Sweden       | 1,029  |
| 12 | U Illinois Urbana Champaign   | 441 | Japan        | 885    |
| 13 | U California Berkeley         | 429 | Norway       | 842    |
| 14 | Wageningen U Research         | 421 | India        | 637    |
| 15 | Texas AM U College Station    | 413 | South Korea  | 610    |
| 16 | U Maryland College Park       | 412 | Denmark      | 575    |
| 17 | CNRS France                   | 396 | Switzerland  | 565    |
| 18 | U Georgia                     | 387 | New Zealand  | 516    |
| 19 | Arizona State U               | 384 | Finland      | 486    |
| 20 | U California Davis            | 380 | South Africa | 475    |
| 21 | Duke U                        | 378 | Belgium      | 464    |
| 22 | Cornell U                     | 376 | Brazil       | 409    |
| 23 | U British Columbia            | 354 | Taiwan       | 363    |
| 24 | Natl Oceanic Atmosph Admin    | 341 | Chile        | 360    |
| 25 | U Washington                  | 339 | Mexico       | 354    |
| 26 | Leibniz Association           | 337 | Ethiopia     | 332    |
| 27 | North Carolina State U        | 336 | Turkey       | 330    |
| 28 | U Washington Seattle          | 335 | Poland       | 323    |
| 29 | Arizona State U Tempe         | 324 | Austria      | 322    |
| 30 | U Copenhagen                  | 323 | Portugal     | 287    |

Abbreviations: R = Rank; TP = Total papers.

**Table A5. Most productive institutions in *LE*.**

| R  | Institution                   | Country | TP  | TC    | H  | C/P   | D1 | D2 | D3 | D4 |
|----|-------------------------------|---------|-----|-------|----|-------|----|----|----|----|
| 1  | U Wisconsin Madison           | USA     | 124 | 3,701 | 29 | 29.85 | 40 | 42 | 32 | 10 |
| 2  | US Dep Agriculture (USDA)     | USA     | 101 | 4,284 | 35 | 42.42 | 15 | 31 | 40 | 15 |
| 3  | Oregon State U                | USA     | 60  | 2,605 | 28 | 43.42 | 6  | 17 | 30 | 7  |
| 4  | U Illinois Urbana Champaign   | USA     | 60  | 2,199 | 22 | 36.65 | 16 | 18 | 16 | 10 |
| 5  | U Maryland College Park       | USA     | 59  | 2,218 | 27 | 37.59 | 6  | 21 | 28 | 4  |
| 6  | US Forest Service             | USA     | 51  | 3,008 | 29 | 58.98 | 8  | 13 | 26 | 4  |
| 7  | Cornell U                     | USA     | 50  | 1,297 | 19 | 25.94 | 6  | 18 | 17 | 9  |
| 8  | Ohio State U                  | USA     | 45  | 1,995 | 23 | 44.33 | 5  | 14 | 15 | 11 |
| 9  | U California Davis            | USA     | 45  | 1,569 | 20 | 34.87 | 3  | 27 | 10 | 5  |
| 10 | Michigan State U              | USA     | 45  | 731   | 12 | 16.24 | 8  | 11 | 12 | 14 |
| 11 | U Rhode Island                | USA     | 42  | 1,636 | 20 | 38.95 | 2  | 11 | 19 | 10 |
| 12 | Pennsylvania State U U Park   | USA     | 41  | 1,115 | 19 | 26.55 | 8  | 16 | 9  | 9  |
| 13 | U Wyoming                     | USA     | 41  | 1,258 | 18 | 30.68 | 2  | 13 | 23 | 3  |
| 14 | Colorado State U Fort Collins | USA     | 39  | 1,233 | 15 | 31.62 | 7  | 12 | 8  | 12 |
| 15 | Resources for the Future      | USA     | 38  | 1,268 | 18 | 33.37 | 3  | 15 | 11 | 9  |
| 16 | Penn State Behrend            | USA     | 38  | 969   | 18 | 25.5  | 7  | 14 | 9  | 8  |
| 17 | U California Berkeley         | USA     | 36  | 2,263 | 14 | 62.86 | 9  | 13 | 9  | 5  |
| 18 | U Florida                     | USA     | 35  | 1,023 | 14 | 29.23 | 8  | 11 | 8  | 8  |
| 19 | North Carolina State U        | USA     | 34  | 1,644 | 18 | 48.35 | 0  | 10 | 20 | 4  |
| 20 | U Georgia                     | USA     | 34  | 1,084 | 17 | 31.88 | 3  | 10 | 12 | 9  |
| 21 | U Delaware                    | USA     | 34  | 919   | 15 | 27.03 | 0  | 18 | 10 | 6  |
| 22 | Texas AM U College Station    | USA     | 33  | 1,197 | 13 | 36.27 | 5  | 10 | 13 | 5  |
| 23 | Purdue U                      | USA     | 33  | 893   | 15 | 27.06 | 2  | 12 | 9  | 10 |
| 24 | U Kentucky                    | USA     | 33  | 698   | 12 | 21.15 | 11 | 10 | 8  | 4  |
| 25 | U Minnesota Twin Cities       | USA     | 31  | 2,010 | 17 | 64.84 | 2  | 13 | 11 | 5  |
| 26 | U Washington Seattle          | USA     | 31  | 340   | 10 | 10.97 | 11 | 9  | 4  | 7  |
| 27 | U Arizona                     | USA     | 30  | 2,601 | 15 | 86.7  | 3  | 19 | 6  | 2  |
| 28 | Duke U                        | USA     | 30  | 1,393 | 17 | 46.43 | 3  | 6  | 15 | 6  |
| 29 | Iowa State U                  | USA     | 30  | 989   | 15 | 32.97 | 7  | 3  | 10 | 10 |
| 30 | Washington State U            | USA     | 30  | 802   | 14 | 26.73 | 8  | 10 | 10 | 2  |
| 31 | Virginia Polytech Inst St U   | USA     | 30  | 750   | 16 | 25    | 1  | 12 | 11 | 6  |
| 32 | US Environ Protection Agency  | USA     | 29  | 1,292 | 18 | 44.55 | 0  | 8  | 12 | 9  |
| 33 | U British Columbia            | CAN     | 29  | 766   | 16 | 26.41 | 8  | 10 | 10 | 1  |
| 34 | The World Bank                | USA     | 27  | 1,670 | 19 | 61.85 | 0  | 11 | 11 | 5  |
| 35 | U Connecticut                 | USA     | 27  | 378   | 8  | 14    | 6  | 3  | 7  | 11 |
| 36 | U Colorado Boulder            | USA     | 26  | 1,436 | 13 | 55.23 | 7  | 5  | 12 | 2  |
| 37 | U Maine Orono                 | USA     | 26  | 1,396 | 18 | 53.69 | 0  | 10 | 15 | 1  |
| 38 | Arizona State U               | USA     | 25  | 498   | 13 | 19.92 | 1  | 5  | 10 | 9  |
| 39 | U Alberta                     | CAN     | 25  | 436   | 12 | 17.44 | 1  | 8  | 8  | 8  |
| 40 | Arizona State U Tempe         | USA     | 23  | 442   | 12 | 19.22 | 1  | 5  | 9  | 8  |
| 41 | Norwegian U Life Sciences     | NOR     | 20  | 891   | 14 | 44.55 | 0  | 0  | 12 | 8  |
| 42 | Nat Oceanic Atmosph Admin     | USA     | 20  | 731   | 13 | 36.55 | 0  | 2  | 13 | 5  |
| 43 | Harvard U                     | USA     | 19  | 1,424 | 12 | 74.95 | 6  | 7  | 5  | 1  |
| 44 | U California Los Angeles      | USA     | 19  | 596   | 10 | 31.37 | 8  | 8  | 3  | 0  |
| 45 | U Michigan                    | USA     | 19  | 554   | 10 | 29.16 | 3  | 10 | 6  | 0  |
| 46 | U New Mexico                  | USA     | 19  | 549   | 12 | 28.89 | 0  | 8  | 8  | 3  |
| 47 | U Missouri Columbia           | USA     | 19  | 503   | 7  | 26.47 | 9  | 6  | 2  | 2  |
| 48 | Georgia State U               | USA     | 18  | 1,224 | 14 | 68    | 0  | 4  | 11 | 3  |
| 49 | 3 institutions                | -       | 17  | -     | -  | -     | -  | -  | -  | -  |

Abbreviations are available in Table 7 in the main text.

Institutions such as the University of California–Berkeley ( $C/P = 62.86$ ), University of Minnesota–Twin Cities ( $C/P = 64.84$ ), and University of Arizona ( $C/P = 86.70$ ) reflect high citation efficiency despite producing fewer than 40 papers each. These results suggest that while publication volume remains a critical indicator of institutional involvement, several elite universities exert influence through highly cited, often interdisciplinary contributions.

The vast majority of listed institutions are based in the United States, highlighting *LE*'s historical U.S.-centrism. Non-U.S. representation includes the University of British Columbia and the University of Alberta (Canada), as well as the Norwegian University of Life Sciences. However, these appear less frequently and often with smaller temporal coverage, suggesting limited but emerging international engagement in recent decades.

Temporal analysis shows that while several institutions had their most productive periods in the early decades (e.g., D1 for Wisconsin and USDA), a significant number of institutions intensified their contribution in the post-1995 period (D3 and D4), indicating a shift toward modern, environmentally focused policy research. Institutions like the University of Georgia, Arizona State University, and the World Bank show diverse patterns of contribution across all eras, revealing a mix of academic and policy-driven knowledge production.

Table A6 presents the 50 most active countries in *LE*, ranking them by total publications (TP), total citations (TC), H-index, citation-per-paper ( $C/P$ ), and two population-normalized metrics: papers per million inhabitants ( $P/Po$ ) and citations per million inhabitants ( $C/Po$ ). The United States stands as the journal's epicenter with 2,197 papers and 64,108 citations, yielding a dominant H-index of 119 and a  $P/Po$  of 6.33—over four times higher than the global median. The U.S. also shows balanced temporal contributions across all four eras, reflecting its longstanding leadership in land and environmental economics. Canada and the UK follow distantly in publication count but demonstrate high citation density and influence. Canada's H-index (31) and  $C/Po$  (96.76) indicate broad dissemination relative to population, while the UK outperforms in  $C/P$  (38.4) and H-index (36), with a publication surge post-1995. Notably, smaller nations like Norway, New Zealand, Denmark, and Switzerland rank far higher when population-adjusted metrics are considered. Norway, for instance, despite publishing just 60 papers, leads all countries in citations per million inhabitants ( $C/Po = 314.41$ ), followed by New Zealand (209.77) and Denmark (170.39), highlighting their outsized intellectual contributions.

**Table A6.** Most productive and influential countries in *LE*.

| R  | Country      | TP    | TC     | H   | C/P   | D1  | D2  | D3  | D4  | P/Po  | C/Po   |
|----|--------------|-------|--------|-----|-------|-----|-----|-----|-----|-------|--------|
| 1  | USA          | 2,197 | 64,108 | 119 | 29.18 | 571 | 776 | 592 | 258 | 6.33  | 184.6  |
| 2  | Canada       | 165   | 3,883  | 31  | 23.53 | 36  | 62  | 47  | 20  | 4.11  | 96.76  |
| 3  | UK           | 109   | 4,186  | 36  | 38.4  | 6   | 16  | 57  | 30  | 1.57  | 60.19  |
| 4  | Germany      | 60    | 1,805  | 21  | 30.08 | 2   | 2   | 20  | 36  | 0.71  | 21.47  |
| 5  | Norway       | 60    | 1,767  | 25  | 29.45 | 0   | 7   | 33  | 20  | 10.68 | 314.41 |
| 6  | Australia    | 57    | 2,052  | 23  | 36    | 3   | 15  | 29  | 10  | 2.11  | 76.08  |
| 7  | Sweden       | 36    | 958    | 19  | 26.61 | 1   | 5   | 21  | 9   | 3.38  | 89.87  |
| 8  | PR China     | 32    | 794    | 15  | 24.81 | 0   | 1   | 10  | 21  | 0.02  | 0.56   |
| 9  | Japan        | 26    | 662    | 12  | 25.46 | 2   | 2   | 12  | 10  | 0.21  | 5.35   |
| 10 | New Zealand  | 25    | 1,074  | 13  | 42.96 | 2   | 4   | 11  | 8   | 4.88  | 209.77 |
| 11 | France       | 23    | 1,000  | 15  | 43.48 | 0   | 0   | 16  | 7   | 0.35  | 15.24  |
| 12 | Netherlands  | 21    | 1,203  | 13  | 57.29 | 0   | 0   | 16  | 5   | 1.18  | 67.7   |
| 13 | Denmark      | 21    | 1,007  | 12  | 47.95 | 0   | 1   | 9   | 11  | 3.55  | 170.39 |
| 14 | Italy        | 15    | 807    | 8   | 53.8  | 2   | 0   | 6   | 7   | 0.25  | 13.71  |
| 15 | Spain        | 14    | 585    | 11  | 41.79 | 0   | 1   | 10  | 3   | 0.29  | 12.25  |
| 16 | Finland      | 12    | 243    | 8   | 20.25 | 1   | 3   | 6   | 2   | 2.16  | 43.71  |
| 17 | Switzerland  | 11    | 451    | 7   | 41    | 0   | 2   | 3   | 6   | 1.25  | 51.25  |
| 18 | Chile        | 8     | 289    | 3   | 36.12 | 5   | 1   | 1   | 1   | 0.41  | 14.83  |
| 19 | Ireland      | 8     | 235    | 6   | 29.38 | 0   | 0   | 5   | 3   | 1.51  | 44.34  |
| 20 | Mexico       | 8     | 67     | 3   | 8.38  | 4   | 0   | 2   | 2   | 0.06  | 0.52   |
| 21 | Israel       | 7     | 176    | 5   | 25.14 | 2   | 2   | 3   | 0   | 0.71  | 17.96  |
| 22 | India        | 7     | 50     | 3   | 7.14  | 1   | 1   | 0   | 5   | 0     | 0.03   |
| 23 | Singapore    | 6     | 25     | 3   | 4.17  | 0   | 1   | 0   | 5   | 1.01  | 4.22   |
| 24 | South Korea  | 5     | 125    | 5   | 25    | 0   | 0   | 1   | 4   | 0.1   | 2.42   |
| 25 | Indonesia    | 5     | 104    | 4   | 20.8  | 0   | 0   | 2   | 3   | 0.02  | 0.36   |
| 26 | Poland       | 5     | 85     | 3   | 17    | 0   | 0   | 1   | 4   | 0.13  | 2.25   |
| 27 | Brazil       | 5     | 74     | 4   | 14.8  | 0   | 0   | 3   | 2   | 0.02  | 0.35   |
| 28 | Greece       | 5     | 50     | 2   | 10    | 1   | 1   | 2   | 1   | 0.48  | 4.76   |
| 29 | Ethiopia     | 4     | 351    | 4   | 87.75 | 0   | 0   | 2   | 2   | 0.03  | 2.6    |
| 30 | Austria      | 4     | 47     | 2   | 11.75 | 0   | 0   | 0   | 4   | 0.44  | 5.16   |
| 31 | Belgium      | 4     | 26     | 4   | 6.5   | 0   | 0   | 2   | 2   | 0.34  | 2.2    |
| 32 | Colombia     | 3     | 96     | 3   | 32    | 1   | 0   | 1   | 1   | 0.06  | 1.85   |
| 33 | Kenya        | 3     | 72     | 3   | 24    | 0   | 0   | 2   | 1   | 0.05  | 1.31   |
| 34 | Iran         | 3     | 18     | 3   | 6     | 1   | 2   | 0   | 0   | 0.03  | 0.2    |
| -  | 13 countries | 2     | -      | -   | -     | -   | -   | -   | -   | -     | -      |
| -  | 16 countries | 1     | -      | -   | -     | -   | -   | -   | -   | -     | -      |

Abbreviations are available in Table 7 in the main text, except for: P/Po and C/Po = Papers and cites per million inhabitants.

Conversely, populous nations such as China and India register modest engagement with *LE* despite their broader research expansions. China, with 32 papers and 794 citations, yields a P/Po of only 0.02, and India registers the lowest C/Po (0.03) among countries with at least five papers. These disparities suggest that *LE*'s niche remains concentrated in economically advanced, Anglophone, and environmentally policy-focused regions.

The data also show the emergence of Global South nations—such as Ethiopia, Chile, and Kenya—with high citation-per-paper scores relative to their volume, possibly indicating the influence of region-specific, high-impact contributions or collaborations. Ethiopia, for instance, has a C/P of 87.75 from just 4 papers, suggesting targeted but influential scholarship.

Temporal distribution reveals that most countries increased their publication share in the post-1995 period (D3 and D4), particularly in Europe, Oceania, and East Asia. This shift aligns with the globalization of environmental policy discourse and the growing relevance of interdisciplinary land use studies in national research agendas. Nonetheless, the dominance of the U.S. and its institutions remains structurally embedded in the journal's citation and publication architecture.

Table A7 presents the longitudinal trajectory of contributions to *LE* by the top 20 countries and top 10 institutions from 2005 to 2024. The United States consistently dominates the journal's authorship landscape with an average of ~27 papers annually and no single year falling below 18 publications. The U.S.'s sustained productivity reflects its entrenched institutional presence and intellectual leadership in land and environmental economics, corroborated by the dominant roles of institutions such as the University of Wisconsin–Madison, USDA, and Oregon State University.

Among other countries, Canada and the UK show modest but consistent activity, with peak years of contribution emerging after 2010, indicating growing scholarly attention to *LE*-aligned topics within these countries' research agendas. Germany, Norway, and Australia also reflect this upward trend, although their annual outputs exhibit more variability. Notably, Norway maintains a relatively steady presence despite its smaller population base, aligning with its high population-normalized productivity observed in Table A6.

In Asia, China and Japan demonstrate a gradual increase in publications over the two decades. China, while still underrepresented in total output, has expanded its contributions since 2015, reflecting the broader globalization of environmental economics scholarship. Conversely,

countries like Sweden, Denmark, and the Netherlands exhibit episodic contributions that cluster in specific years, likely driven by collaborative or policy-relevant projects.

On the institutional front, the University of Wisconsin–Madison leads with 124 papers, though its output is concentrated in earlier years (notably 2011–2013), with fewer recent contributions. The USDA displays consistent productivity across the full period, indicative of its central role in policy-driven research. Other U.S. institutions such as Oregon State, Illinois Urbana-Champaign, and the US Forest Service maintain moderate but stable output levels.

Institutional participation from outside the U.S. remains limited in this list, underscoring *LE*'s traditional North American orientation. However, recent increases in contributions from institutions like Cornell, Michigan State, and Ohio State may signal renewed interest in *LE*'s thematic focus, possibly driven by evolving policy frameworks and interdisciplinary research trends.

The table illustrates a pattern of concentration—both geographically and institutionally—suggesting that while *LE* maintains a global readership, its authorship base is primarily situated in a selective group of North American public research institutions. This concentration highlights both the journal's legacy within this scholarly community and the potential for diversification as environmental challenges become increasingly global.

**Table A7.** Annual publication trends (2005–2024) of the most productive countries and institutions contributing to *LE*.

| R  | Country                     | Total | 05 | 06 | 07 | 08 | 09 | 10 | 11 | 12 | 13 | 14 | 15 | 16 | 17 | 18 | 19 | 20 | 21 | 22 | 23 | 24 |
|----|-----------------------------|-------|----|----|----|----|----|----|----|----|----|----|----|----|----|----|----|----|----|----|----|----|
| 1  | USA                         | 2,197 | 26 | 22 | 22 | 28 | 29 | 28 | 33 | 28 | 33 | 23 | 21 | 25 | 24 | 26 | 26 | 27 | 36 | 31 | 18 | 24 |
| 2  | Canada                      | 165   | 1  | 2  | 7  | 2  | 5  | 2  | 4  | 3  | 1  | 0  | 2  | 0  | 2  | 3  | 2  | 3  | 0  | 2  | 4  | 2  |
| 3  | UK                          | 109   | 3  | 2  | 4  | 4  | 3  | 5  | 2  | 4  | 4  | 2  | 4  | 2  | 1  | 3  | 2  | 0  | 9  | 3  | 4  | 2  |
| 4  | Germany                     | 60    | 1  | 0  | 2  | 2  | 1  | 1  | 3  | 5  | 1  | 3  | 4  | 3  | 5  | 1  | 1  | 1  | 7  | 2  | 8  | 4  |
| 5  | Norway                      | 60    | 3  | 1  | 1  | 1  | 4  | 3  | 3  | 1  | 0  | 3  | 4  | 3  | 2  | 0  | 1  | 1  | 5  | 2  | 2  | 0  |
| 6  | Australia                   | 57    | 3  | 1  | 1  | 4  | 3  | 1  | 1  | 4  | 1  | 1  | 1  | 2  | 0  | 0  | 3  | 0  | 2  | 1  | 1  | 0  |
| 7  | Sweden                      | 36    | 2  | 0  | 0  | 1  | 1  | 1  | 3  | 2  | 1  | 1  | 1  | 0  | 1  | 3  | 0  | 0  | 2  | 1  | 0  | 1  |
| 8  | PR China                    | 32    | 0  | 1  | 0  | 0  | 0  | 1  | 2  | 1  | 1  | 1  | 1  | 1  | 2  | 4  | 1  | 2  | 4  | 2  | 2  | 2  |
| 9  | Japan                       | 26    | 1  | 0  | 0  | 2  | 3  | 1  | 0  | 1  | 1  | 0  | 2  | 2  | 0  | 0  | 0  | 1  | 3  | 0  | 1  | 1  |
| 10 | New Zealand                 | 25    | 1  | 1  | 1  | 1  | 1  | 2  | 1  | 0  | 0  | 1  | 0  | 2  | 0  | 0  | 3  | 1  | 1  | 1  | 0  | 0  |
| 11 | France                      | 23    | 1  | 3  | 0  | 0  | 1  | 1  | 2  | 0  | 1  | 2  | 2  | 2  | 1  | 0  | 0  | 0  | 1  | 0  | 0  | 1  |
| 12 | Netherlands                 | 21    | 0  | 2  | 1  | 1  | 2  | 3  | 0  | 0  | 1  | 2  | 1  | 1  | 1  | 1  | 1  | 0  | 0  | 0  | 0  | 0  |
| 13 | Denmark                     | 21    | 1  | 0  | 2  | 2  | 0  | 0  | 0  | 0  | 0  | 1  | 3  | 0  | 1  | 0  | 1  | 0  | 3  | 1  | 1  | 1  |
| 14 | Italy                       | 15    | 1  | 0  | 0  | 0  | 1  | 1  | 0  | 1  | 1  | 0  | 0  | 1  | 0  | 2  | 0  | 0  | 1  | 1  | 1  | 1  |
| 15 | Spain                       | 14    | 0  | 1  | 0  | 1  | 2  | 1  | 0  | 1  | 1  | 3  | 1  | 1  | 1  | 0  | 0  | 0  | 0  | 0  | 0  | 0  |
| 16 | Finland                     | 12    | 0  | 0  | 0  | 0  | 0  | 1  | 1  | 0  | 1  | 1  | 1  | 0  | 0  | 0  | 0  | 0  | 0  | 1  | 0  | 0  |
| 17 | Switzerland                 | 11    | 0  | 0  | 0  | 0  | 0  | 1  | 0  | 0  | 2  | 0  | 2  | 0  | 1  | 1  | 0  | 1  | 1  | 0  | 0  | 0  |
| 18 | Chile                       | 8     | 0  | 0  | 0  | 0  | 0  | 0  | 0  | 1  | 0  | 0  | 0  | 0  | 0  | 0  | 0  | 0  | 1  | 0  | 0  | 0  |
| 19 | Ireland                     | 8     | 0  | 1  | 0  | 1  | 0  | 1  | 0  | 0  | 1  | 0  | 1  | 0  | 0  | 0  | 0  | 0  | 1  | 0  | 0  | 1  |
| 20 | Mexico                      | 8     | 0  | 0  | 0  | 0  | 0  | 0  | 1  | 1  | 0  | 0  | 0  | 0  | 1  | 0  | 0  | 1  | 0  | 0  | 0  | 0  |
| R  | Institution                 | Total | 05 | 06 | 07 | 08 | 09 | 10 | 11 | 12 | 13 | 14 | 15 | 16 | 17 | 18 | 19 | 20 | 21 | 22 | 23 | 24 |
| 1  | U Wisconsin Madison         | 124   | 0  | 1  | 1  | 1  | 1  | 0  | 3  | 3  | 5  | 0  | 1  | 2  | 0  | 1  | 2  | 0  | 1  | 3  | 0  | 0  |
| 2  | US Dep Agriculture          | 101   | 1  | 3  | 3  | 3  | 3  | 1  | 1  | 3  | 2  | 1  | 2  | 2  | 2  | 1  | 2  | 0  | 3  | 1  | 0  | 2  |
| 3  | Oregon State U              | 60    | 1  | 2  | 1  | 4  | 1  | 2  | 2  | 1  | 1  | 0  | 1  | 0  | 1  | 0  | 1  | 1  | 1  | 0  | 1  | 1  |
| 4  | U Illinois Urbana Champaign | 60    | 0  | 1  | 0  | 0  | 1  | 0  | 2  | 1  | 1  | 4  | 1  | 0  | 1  | 2  | 2  | 1  | 1  | 1  | 1  | 0  |
| 5  | U Maryland College Park     | 59    | 1  | 2  | 2  | 1  | 2  | 0  | 1  | 1  | 1  | 0  | 0  | 1  | 0  | 0  | 0  | 2  | 1  | 0  | 0  | 0  |
| 6  | US Forest Service           | 51    | 1  | 3  | 1  | 2  | 2  | 1  | 0  | 1  | 1  | 0  | 0  | 0  | 0  | 0  | 1  | 0  | 1  | 1  | 0  | 1  |
| 7  | Cornell U                   | 50    | 0  | 0  | 0  | 2  | 1  | 0  | 3  | 0  | 0  | 1  | 0  | 0  | 1  | 0  | 1  | 3  | 1  | 1  | 0  | 2  |
| 8  | Ohio State U                | 45    | 1  | 0  | 1  | 1  | 1  | 1  | 0  | 0  | 1  | 2  | 0  | 2  | 1  | 1  | 1  | 1  | 1  | 3  | 0  | 1  |
| 9  | U California Davis          | 45    | 1  | 0  | 1  | 1  | 0  | 1  | 2  | 0  | 0  | 1  | 0  | 0  | 2  | 0  | 1  | 0  | 1  | 0  | 1  | 0  |
| 10 | Michigan State U            | 45    | 0  | 0  | 2  | 0  | 3  | 0  | 0  | 1  | 2  | 0  | 0  | 1  | 2  | 1  | 2  | 3  | 1  | 3  | 0  | 1  |

Abbreviations: R = Rank; 05-24 = Annual number of documents published between 2005 and 2024.

Table A8 categorizes the publication performance of *LE* by supranational regions, illustrating pronounced geographic concentration. North America overwhelmingly dominates, accounting for 2,334 papers (nearly 83% of the total) with 66,958 citations, an H-index of 120, and 28.69 citations per paper. This aligns with the historical roots of the journal and the centrality of U.S. and Canadian institutions in land and resource economics. Additionally, the high paper- and citation-per-million-population indicators (6.03 and 173.04, respectively) underscore the region's intellectual density and infrastructural support for sustained scholarly output.

Europe ranks second, contributing 341 publications with a cumulative 11,494 citations and a high H-index of 56. While its total output is modest relative to North America, Europe demonstrates a higher citation-per-paper rate (33.71), indicating a stronger average impact. Temporal distribution reveals an acceleration of European contributions post-1995, likely influenced by EU-wide funding schemes and growing interest in sustainability economics.

Asia contributes 100 papers, with a relatively low C/P value (22.08), reflecting limited yet growing engagement. Importantly, most of these papers were published in the most recent decade (D4), showing a clear upward trajectory led by China and Japan. Despite this, Asia exhibits minimal productivity and impact per capita, suggesting untapped potential and possible access barriers or prioritization of local journals.

Oceania, driven mainly by Australian and New Zealand institutions, provides 77 papers and 2,932 citations, boasting the highest citation-per-paper ratio (38.08) among all regions. Its strong performance normalized by population (1.66 papers and 63.09 citations per million) further confirms Oceania's high-efficiency research output, particularly notable given its small population base.

Latin America and Africa remain underrepresented with 32 and 16 papers, respectively, although Africa's citation-per-paper ratio (36.44) is on par with leading regions, driven by a few high-impact studies. Both regions show minimal per-capita indicators, pointing to systemic limitations in research funding and visibility in top-tier economics journals.

The table highlights the persistent geographical concentration of *LE*'s authorship in the Global North, particularly in North America, with emerging contributions from Asia and underexploited participation from the Global South. These findings echo broader patterns in

economic research and underscore the journal’s opportunity to engage more diverse regional perspectives as global sustainability and land use issues intensify.

**Table A8.** Regional distribution of publication and citation output in *LE*.

| R | Region        | TP    | TC     | H   | C/P   | D1  | D2  | D3  | D4  | P/Pop | C/Pop  |
|---|---------------|-------|--------|-----|-------|-----|-----|-----|-----|-------|--------|
| 1 | North America | 2,334 | 66,958 | 120 | 28.69 | 605 | 828 | 627 | 274 | 6.03  | 173.04 |
| 2 | Europe        | 341   | 11,494 | 56  | 33.71 | 13  | 37  | 174 | 117 | 0.46  | 15.44  |
| 3 | Asia          | 100   | 2,208  | 29  | 22.08 | 7   | 11  | 37  | 45  | 0.02  | 0.46   |
| 4 | Oceania       | 77    | 2,932  | 27  | 38.08 | 5   | 19  | 37  | 16  | 1.66  | 63.09  |
| 5 | Latin America | 32    | 762    | 13  | 23.81 | 12  | 1   | 11  | 8   | 0.05  | 1.14   |
| 6 | Africa        | 16    | 583    | 9   | 36.44 | 1   | 2   | 7   | 6   | 0.01  | 0.38   |

Abbreviations are available in Table 7 in the main text and Table A6 herein.



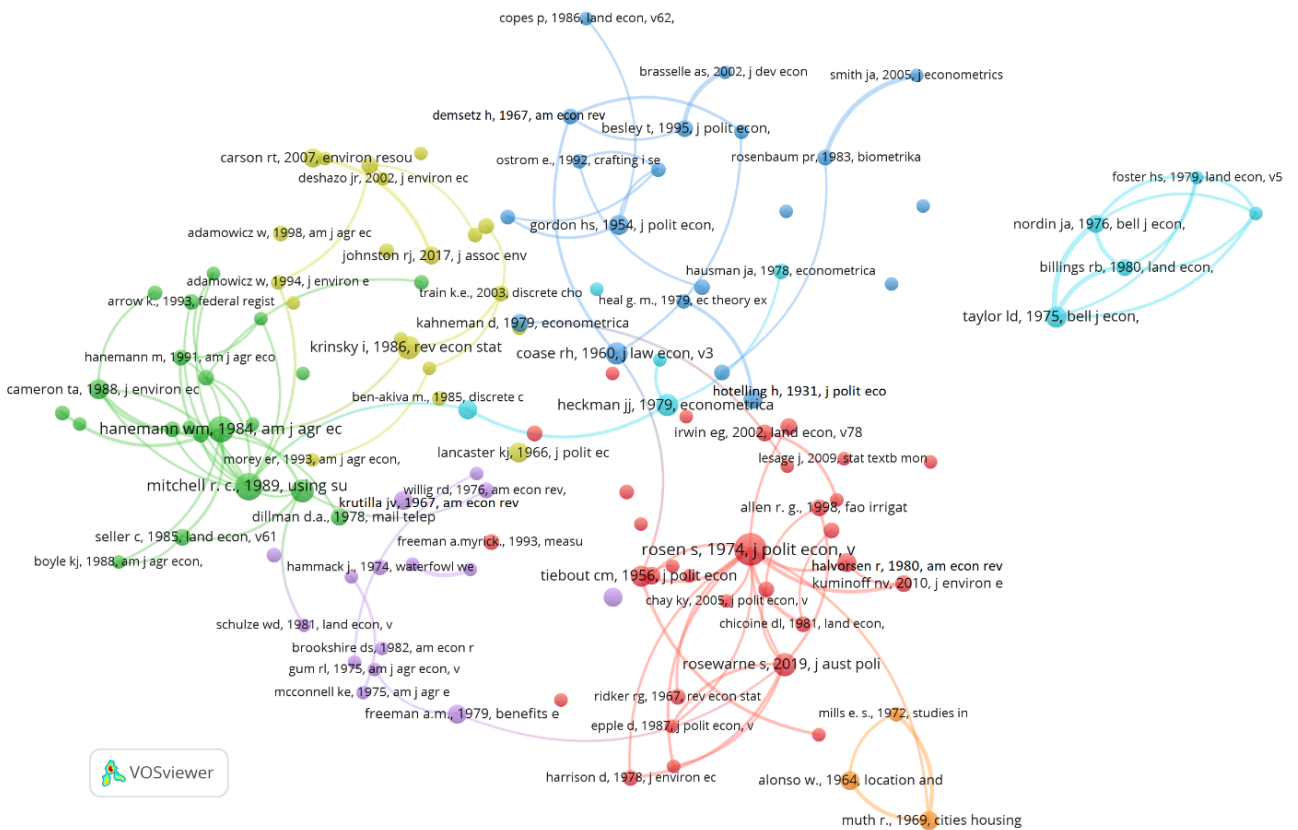

**Figure A2.** Co-citation map of documents cited in *LE*, based on a minimum threshold of 15 citations and 100 links (VOSviewer).



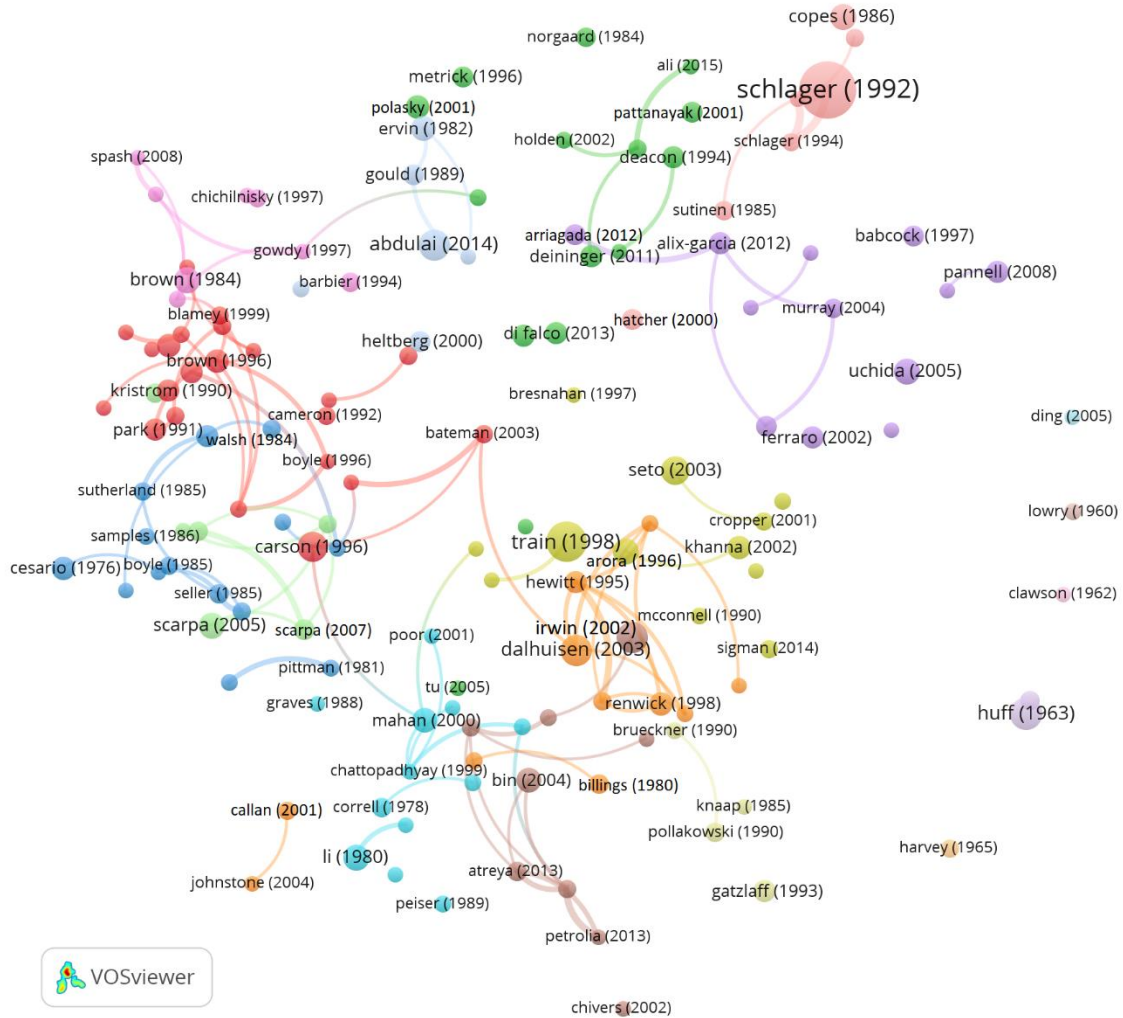

**Figure A4.** Bibliographic coupling of documents published in *LE*, with a minimum of 100 citations and 100 inter-document links (VOSviewer).

Figure A5 illustrates the bibliographic coupling of *LE* authors who have published at least five papers and share a minimum of 100 citation links. Node color represents the average year of publication (from blue = early to red = recent), aligned with productivity and influence patterns in Table 8 in the main text. The central orange cluster represents recent contributors (post-2010), including Plantinga, Klaiber, Lewis, Lupi, and Deininger, who are linked through land use dynamics, climate policy, and spatial econometrics. Their tight interconnectivity reflects shared reference frameworks in contemporary land and resource modeling.

The yellow–green cluster features enduring authors such as Boyle, Hanley, McConnell, Loomis, and Smith, known for their seminal work in environmental valuation and policy evaluation. Their sustained presence since the early 2000s positions them at the methodological core of *LE*. A green subcluster, including Bishop, Brown, and Opaluch, bridges the empirical and theoretical traditions in resource and benefit transfer studies, maintaining relevance across decades.

Peripheral authors in blue (e.g., Evans, Andrews, Wehrwein) represent *LE*'s early contributors from the 1940s–1970s. Despite limited contemporary connectivity, their historical prominence is preserved in Table 8 through high publication counts. The structure shows that while *LE* has expanded into modern land use, conservation, and econometric modeling, its citation fabric remains anchored in foundational valuation and policy assessment literature. The coupling map reflects both generational continuity and thematic renewal in the journal's author community.

Figure A6 visualizes the inter-institutional structure of bibliographic coupling in *LE*, highlighting institutions with shared citation patterns. Color indicates the average publication year (blue = earlier, red = more recent), aligning with productivity metrics in Table A5. At the center of the network, University of Wisconsin–Madison, University of Illinois, and Ohio State University form the densest core, reflecting their long-standing and diverse contributions to *LE* across multiple domains—valuation, land use, and agricultural policy. Their strong connections with institutions like Michigan State, Maryland, and UC Berkeley indicate shared disciplinary foundations and methodological overlap.

Oregon State University, Cornell, USDA, and US Forest Service appear as key nodes bridging applied environmental economics and federal land policy research. These institutions consistently show high coupling density, confirming their leadership in integrating empirical resource studies within *LE*. Emerging players such as Duke, Arizona, Florida, and Texas A&M,

exhibit increasingly warm node colors, suggesting greater publication activity in the past decade—often focused on spatial modeling, ecosystem service valuation, or behavioral economics.

Peripheral institutions—e.g., University of Western Australia, Peking University, and Leeds—represent *LE*’s growing internationalization, though their link density remains moderate due to field-specific or regional citation networks. The coupling structure reflects a mature and collaborative research environment, with U.S.-based institutions dominating both output and intellectual connectivity. The spread of color gradients from blue to red also signals *LE*’s sustained renewal, as established institutions integrate with newer research hubs.

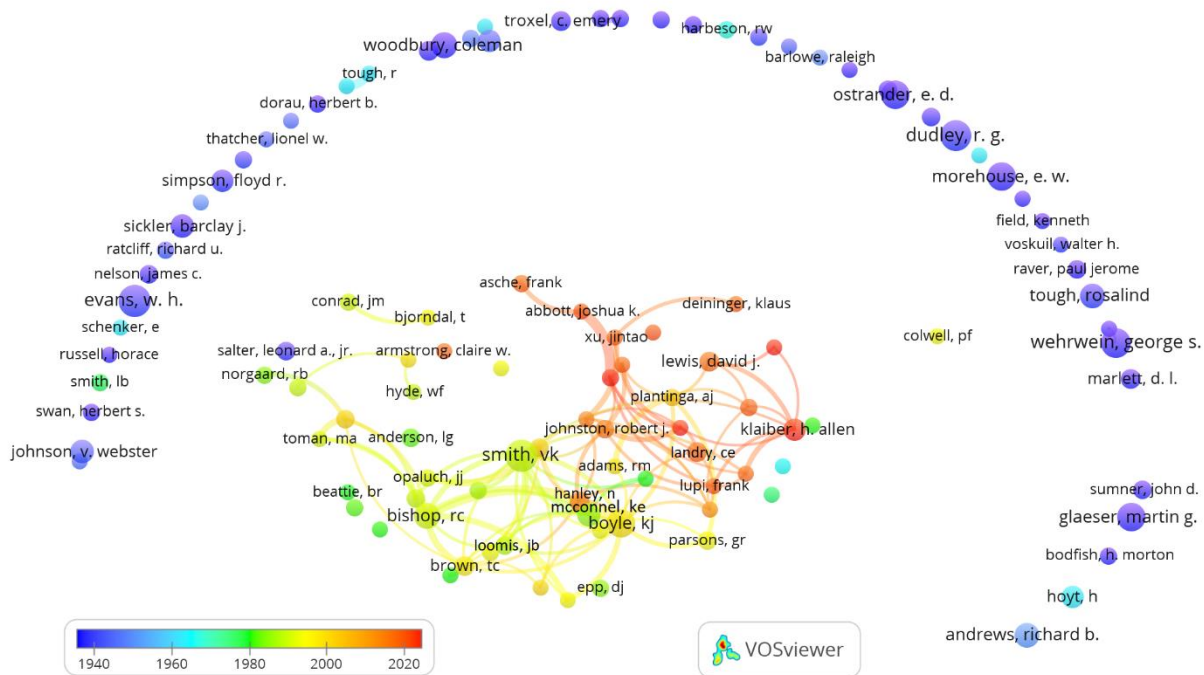

**Figure A5.** Bibliographic coupling of authors publishing in *LE*, with a minimum of 5 documents and 100 links (VOSviewer).



Figure A7 depicts the bibliographic coupling network of countries contributing to *LE*, reflecting shared citation practices and intellectual linkages. Node size corresponds to publication volume; color indicates average publication year (blue = earlier, red = recent), aligned with Table 10 in the main text. The USA dominates the network with the largest node and the strongest links, acting as the central hub of global *LE* scholarship. It exhibits robust coupling with Canada, Germany, England, and Australia, reflecting sustained collaboration and methodological alignment in land use, environmental policy, and valuation studies.

Germany, Canada, and England form secondary hubs, tightly linked with each other and with multiple European nations (e.g., Sweden, Netherlands, France), indicating a strong regional research fabric. Australia and New Zealand show dense interlinkages with Anglo-American and European countries, underlining their active role in applied environmental economics and land use research within *LE*. Emerging economies like China, India, and Chile appear with thinner links and warmer node colors, indicating more recent and growing engagement with *LE*'s research topics. Their ties are primarily anchored to the USA and key European countries. The map highlights the USA's centrality, the clustering of established economies, and the increasing bibliographic integration of newer contributors in *LE*'s global knowledge network.

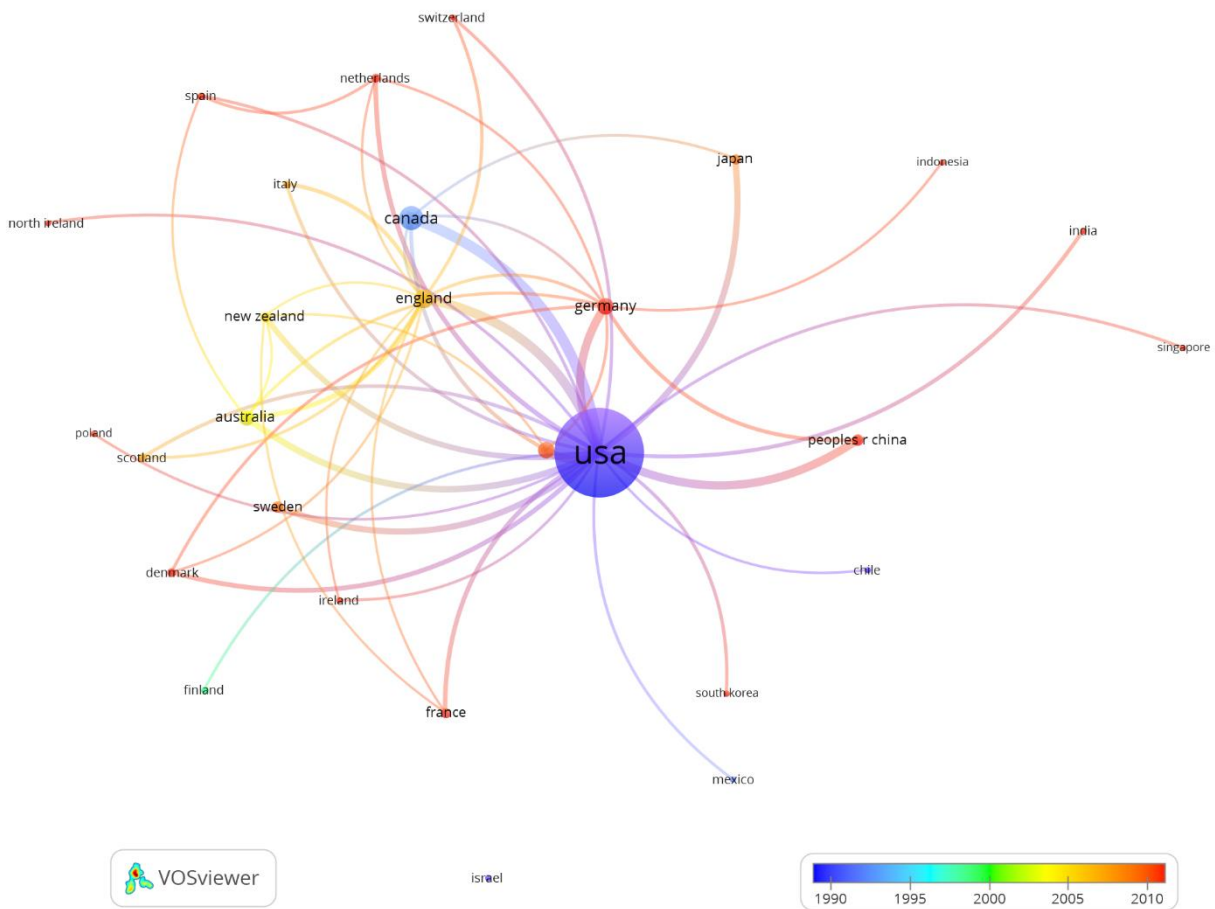

**Figure A7.** Bibliographic coupling of countries publishing in *LE*, with a minimum of 5 publications and 50 shared reference links (VOSviewer).



**Table A9.** Most frequent Keywords Plus in *LE* globally and by period (1995–2024), and the evolution of core concepts and emerging topics.

| Global |                      | 2015-2024 |                      | 2005-2014 |                      | 1995-2004 |                      |     |
|--------|----------------------|-----------|----------------------|-----------|----------------------|-----------|----------------------|-----|
| R      | Keyword              | Occ       | Keyword              | Occ       | Keyword              | Occ       | Keyword              | Occ |
| 1      | Model                | 166       | Impact               | 73        | Model                | 62        | Model                | 45  |
| 2      | Impact               | 124       | Model                | 44        | Impact               | 31        | Choice               | 24  |
| 3      | Values               | 85        | Values               | 32        | Price                | 28        | Values               | 24  |
| 4      | Price                | 84        | Willingness-to-Pay   | 30        | Management           | 25        | Contingent Valuation | 20  |
| 5      | Contingent Valuation | 75        | Price                | 29        | Choice               | 24        | Impact               | 20  |
| 6      | Economics            | 74        | Conservation         | 28        | Values               | 23        | Price                | 20  |
| 7      | Policy               | 74        | Economics            | 27        | Contingent Valuation | 22        | Economics            | 19  |
| 8      | Management           | 68        | Demand               | 26        | Policy               | 22        | Policy               | 19  |
| 9      | Choice               | 64        | Management           | 26        | Economics            | 21        | Cost                 | 17  |
| 10     | Market               | 63        | Contingent Valuation | 24        | Market               | 20        | Demand               | 16  |
| 11     | Demand               | 62        | Policy               | 24        | Willingness-to-Pay   | 19        | Market               | 16  |
| 12     | Cost                 | 59        | Preferences          | 24        | Conservation         | 18        | Public Goods         | 11  |
| 13     | Willingness-to-Pay   | 59        | Risk                 | 22        | Cost                 | 17        | United States        | 11  |
| 14     | Conservation         | 55        | Information          | 21        | Risk                 | 15        | Benefits             | 10  |
| 15     | Preferences          | 47        | Market               | 20        | Deforestation        | 14        | Growth               | 10  |
| 16     | Risk                 | 46        | Cost                 | 19        | Determinants         | 14        | Management           | 10  |
| 17     | Benefits             | 45        | Benefits             | 18        | Growth               | 14        | Preferences          | 10  |
| 18     | Impacts              | 43        | Climate Change       | 18        | Land                 | 14        | Quality              | 10  |
| 19     | Valuation            | 43        | Valuation            | 18        | United States        | 14        | Valuation            | 10  |
| 20     | Information          | 42        | Adoption             | 15        | Benefits             | 13        | Willingness-to-Pay   | 10  |
| 21     | Growth               | 41        | Determinants         | 15        | Demand               | 13        | Bias                 | 9   |
| 22     | Quality              | 38        | Ecosystem Services   | 15        | Incentives           | 13        | Conservation         | 9   |
| 23     | Efficiency           | 36        | Growth               | 15        | Preferences          | 13        | Deforestation        | 9   |
| 24     | Land                 | 36        | Choice               | 14        | Efficiency           | 12        | Efficiency           | 9   |
| 25     | United States        | 36        | Efficiency           | 14        | Property Rights      | 12        | Information          | 9   |
| 26     | Determinants         | 33        | Quality              | 14        | Information          | 11        | Property Rights      | 9   |
| 27     | Property Rights      | 32        | Behavior             | 13        | Valuation            | 11        | Uncertainty          | 9   |
| 28     | Incentives           | 31        | Choice Experiments   | 13        | Behavior             | 10        | Dichotomous Choice   | 8   |
| 29     | Deforestation        | 30        | Incentives           | 13        | Quality              | 10        | Land                 | 8   |
| 30     | Pollution            | 29        | 2 Keywords           | 13        | 2 Keywords           | 10        | Referendum Data      | 8   |

Abbreviations: R = Rank; Occ = Occurrences. Note that currently, Keyword Plus is available in *LE* since 1991.

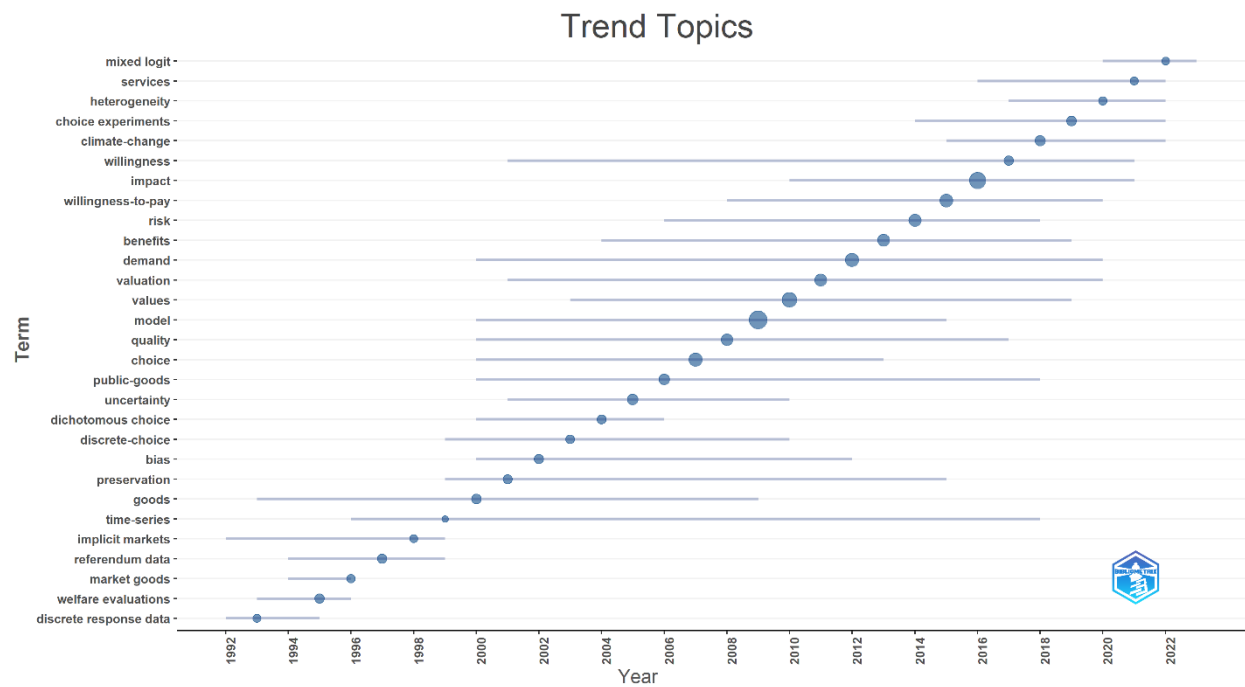

**Figure A9.** Trend topics in *LE* generated using Bibliometrix and the temporal evolution and peak periods of key research themes.

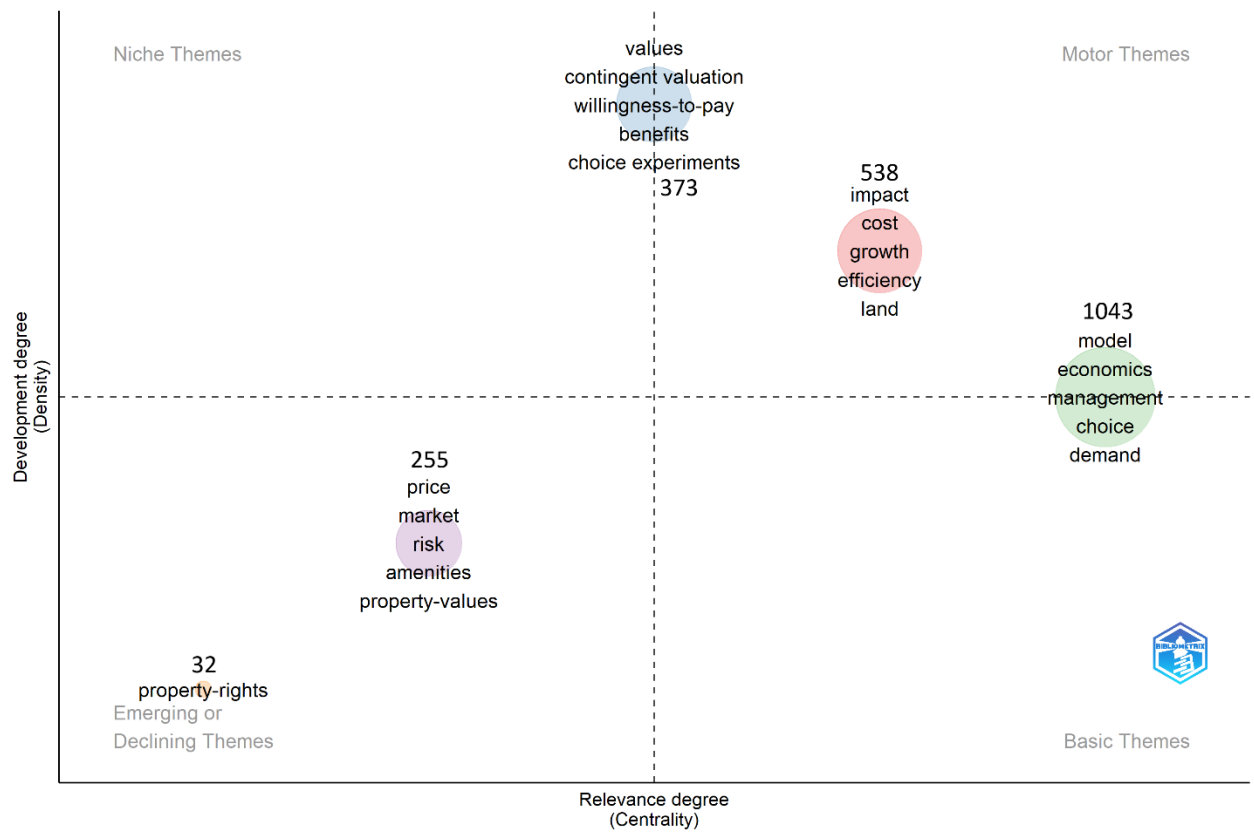

**Figure A10.** Thematic map of *LE* with the 250 most frequent author keywords (minimum cluster frequency of 4), generated using Bibliometrix with the Walktrap clustering algorithm.

Table A10 presents the most prominent topic clusters in *LE* research between 2014 and 2023, as identified in Scopus via the SciVal platform. These clusters reflect aggregated thematic areas, offering a broader perspective on *LE*'s intellectual landscape. The analysis uses the FWCI to measure citation performance relative to the world average in similar fields (Purkayastha et al. 2019) and worldwide PP to indicate relative global visibility (Klavans and Boyack 2017).

The “Natural Resource; Land Use Change; Contingent Valuation” cluster (61 papers; FWCI 0.76; PP 95.55) leads, underscoring *LE*'s sustained focus on environmental valuation and land use dynamics. The “Housing Market; Regression Analysis; Real Estate Sector” cluster (52 papers; FWCI 0.76; PP 43.62) highlights the journal's enduring contributions to urban and housing economics, though with moderate global visibility.

Clusters such as “Data Envelopment Analysis; Industry; Regression Analysis” (FWCI 1.18; PP 80.37) and “Climate Change; Disaster Management; Social Media” (FWCI 1.27; PP 91.23) demonstrate above-average citation performance, pointing to *LE*'s engagement with methodological innovations and emerging societal challenges. Similarly, “Water Distribution; Hydraulics; Water-Energy Nexus” achieved the highest FWCI (1.67), indicating strong citation impact despite modest output. Conversely, clusters like “Property Right; Political Ecology; Ownership” (PP 13.99) and “Volunteering; Altruism; Pricing” (PP 43.36) show lower global prominence, suggesting niche or localized interest. Overall, these clusters reveal *LE*'s diverse scholarly contributions across environmental economics, housing markets, water policy, and climate change, with varying degrees of citation influence and visibility.

**Table A10.** Leading topic clusters in *LE* between 2014 and 2023 (SciVal – Scopus).

| R  | Topic Cluster                                                       | TP | FWCI | PP    |
|----|---------------------------------------------------------------------|----|------|-------|
| 1  | Natural Resource; Land Use Change; Contingent Valuation             | 61 | 0.76 | 95.55 |
| 2  | Housing Market; Regression Analysis; Real Estate Sector             | 52 | 0.76 | 43.62 |
| 3  | Transport; Travel Time; Traffic Congestion                          | 30 | 0.88 | 74.16 |
| 4  | Natural Resource; Environmental Policy; Deforestation               | 19 | 0.87 | 45.91 |
| 5  | Data Envelopment Analysis; Industry; Regression Analysis            | 17 | 1.18 | 80.37 |
| 6  | Cointegration; Environmental Kuznets Curve; Carbon Dioxide Emission | 11 | 0.64 | 99.41 |
| 7  | Property Right; Political Ecology; Ownership                        | 11 | 0.66 | 13.99 |
| 8  | Protected Area; Deforestation; Natural Resource                     | 10 | 0.9  | 56.83 |
| 9  | Water Management; Irrigation; Climate Change                        | 9  | 0.57 | 76.97 |
| 10 | Social Capital; Housing Market; Immigrant                           | 9  | 0.71 | 53.63 |
| 11 | Climate Change; Disaster Management; Social Media                   | 8  | 1.27 | 91.23 |
| 12 | Volunteering; Altruism; Pricing                                     | 8  | 0.35 | 43.36 |
| 13 | Pro-Environmental Behavior; Climate Change; Environmental Policy    | 7  | 0.42 | 94.24 |
| 14 | Causal Inference; Regression Analysis; Randomized Controlled Trial  | 6  | 0.67 | 81.62 |
| 15 | Climate Change; Agricultural Science; Irrigation                    | 6  | 1.24 | 72.79 |
| 16 | Water Distribution; Hydraulics; Water-Energy Nexus                  | 6  | 1.67 | 48.59 |
| 17 | Green Innovation; Industry; Social Responsibility                   | 5  | 0.32 | 98.56 |
| 18 | Decision Making; Behavioral Economics; Prospect Theory              | 5  | 0.22 | 57.35 |
| -  | 4 Topic Clusters                                                    | 4  | -    | -     |
| -  | 9 Topic Clusters                                                    | 3  | -    | -     |
| -  | 10 Topic Clusters                                                   | 2  | -    | -     |
| -  | 34 Topic Clusters                                                   | 1  | -    | -     |

Abbreviations are available in Table A9.
